# Supplementary material
Source: Springer Nature journal article supplement (https://www.springermedizin.de/resource/supplementary/12899_2003_57_MOESM7_ESM.pdf/9514840)

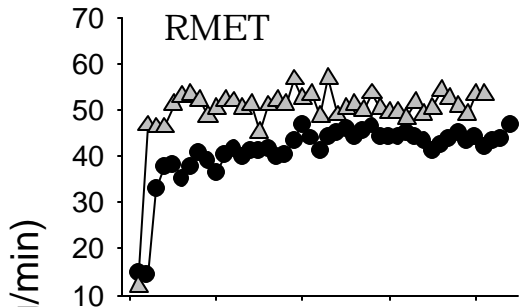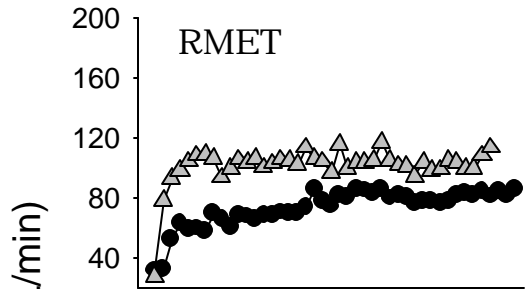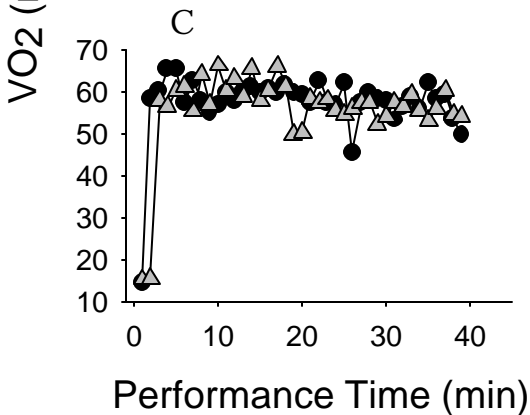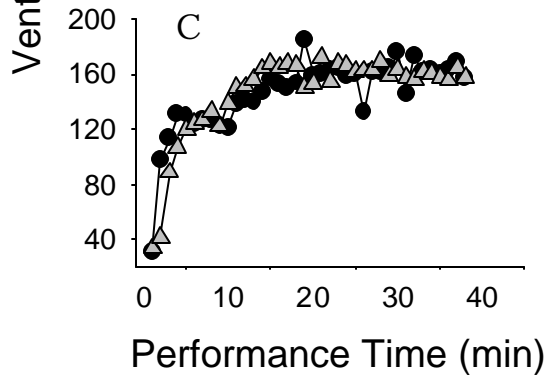

Supplement: MOESM7 [file 9514840]
